# Supplementary material for: Isolation and molecular characterization of prevalent Fowl adenovirus strains in southwestern China during 2015–2016 for the development of a control strategy
Source: PubMed Central journal article supplement (PMC5717092; doi:10.1038/emi.2017.91), 2017-11-29
Supplement: emi201791x1.pdf [file emi201791x1.pdf]

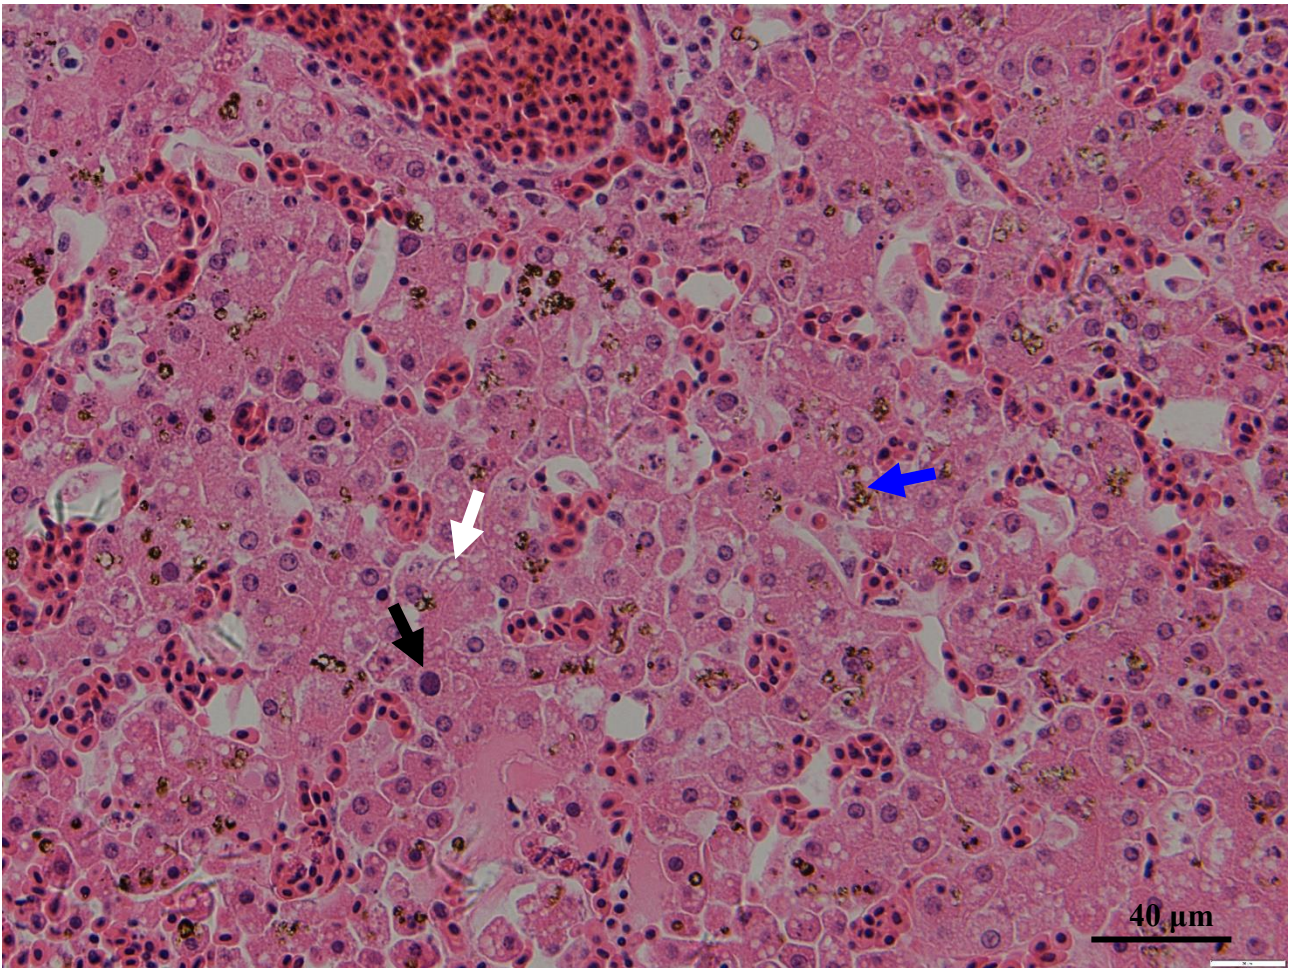

1

2 **Supplementary Figure S1:** Lesions in a liver of a chicken challenged with CH/GZXF/1602  
3 (FAdV-4) at 5 d.p.c. Diffuse fatty degeneration (indicated with a white arrow), INIBs (indicated  
4 with a black arrow), congestion, and hemosiderin in liver cells (indicated with a blue arrow).
