# Supplementary material for: Isolation and molecular characterization of prevalent Fowl adenovirus strains in southwestern China during 2015–2016 for the development of a control strategy
Source: PubMed Central journal article supplement (PMC5717092; doi:10.1038/emi.2017.91), 2017-11-29
Supplement: emi201791x2.pdf [file emi201791x2.pdf]

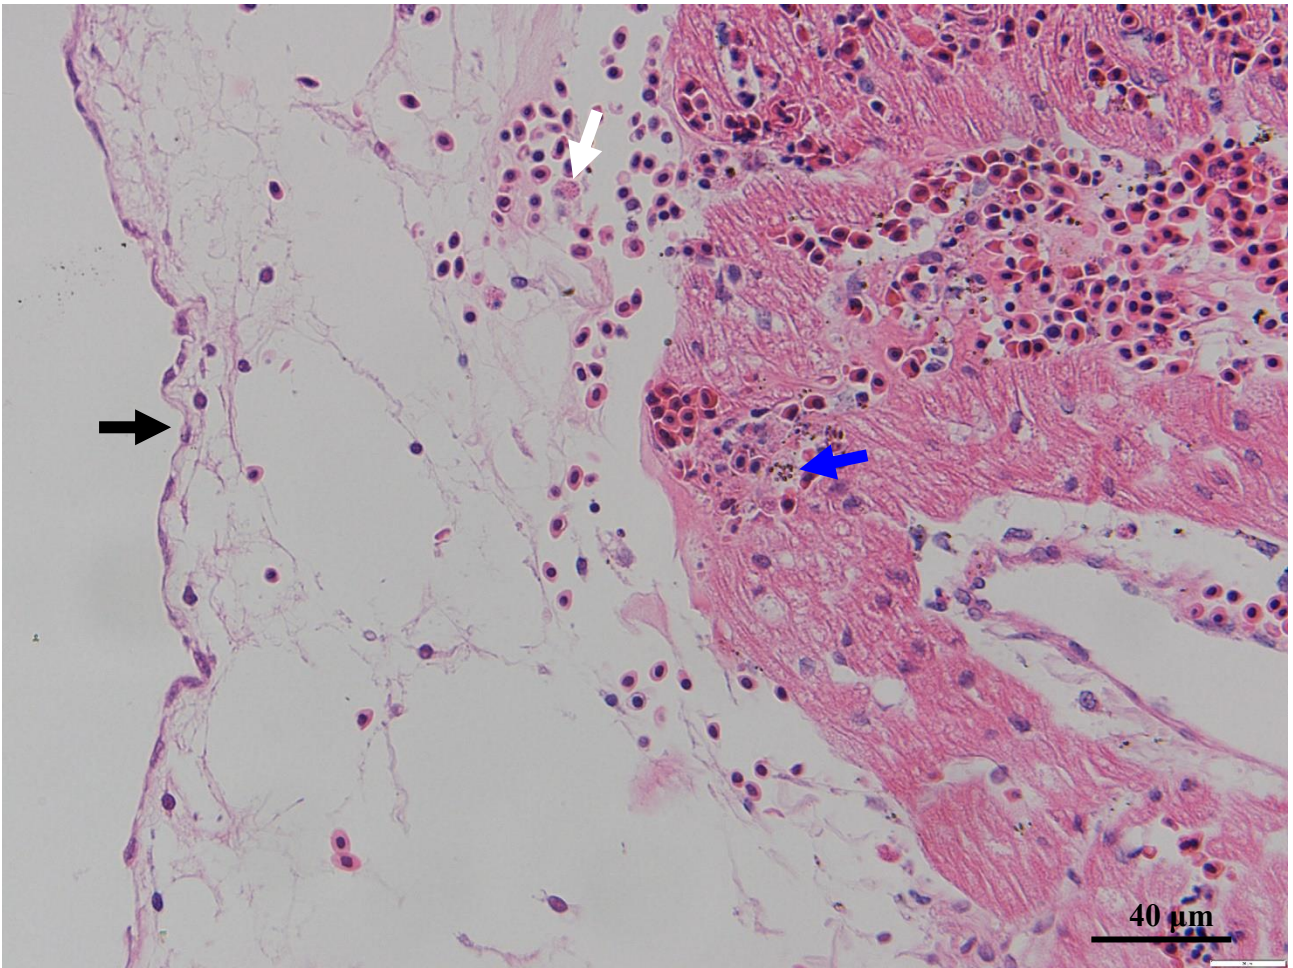

1

2 **Supplementary Figure 2:** Heart lesions in a chicken challenged with CH/GZXF/1602 (FAdV-4) at  
3 5 d.p.c. Epicardium incrassation (indicated with a black arrow), edema, congestion, hemorrhage,  
4 inflammatory cell infiltration (indicated with a white arrow), serous effusion, and hemosiderin  
5 (indicated with a blue arrow).
