# Supplementary material for: Isolation and molecular characterization of prevalent Fowl adenovirus strains in southwestern China during 2015–2016 for the development of a control strategy
Source: PubMed Central journal article supplement (PMC5717092; doi:10.1038/emi.2017.91), 2017-11-29
Supplement: emi201791x3.pdf [file emi201791x3.pdf]

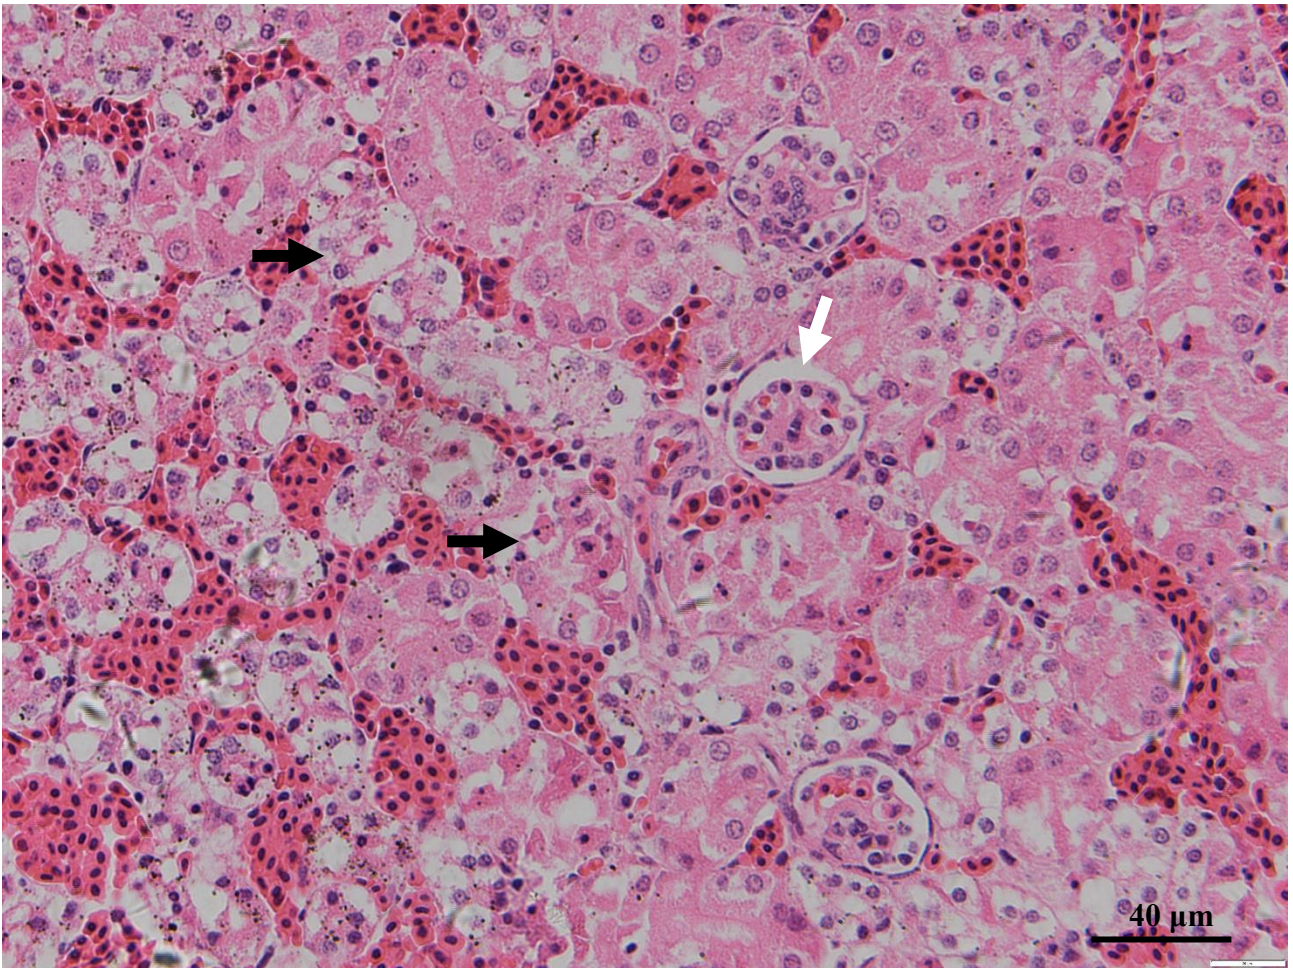

1

2 **Supplementary Figure S3:** Kidney lesions in a chicken challenged with CH/GZXF/1602 (FAvV-4)  
3 at 5 d.p.c. Diffuse renal tubular epithelial cell necrosis and falling (indicated with black arrows),  
4 glomerular capsule dilation (indicated with a white arrow), congestion, and hemosiderin deposition.
