# Supplementary material for: Isolation and molecular characterization of prevalent Fowl adenovirus strains in southwestern China during 2015–2016 for the development of a control strategy
Source: PubMed Central journal article supplement (PMC5717092; doi:10.1038/emi.2017.91), 2017-11-29
Supplement: emi201791x4.pdf [file emi201791x4.pdf]

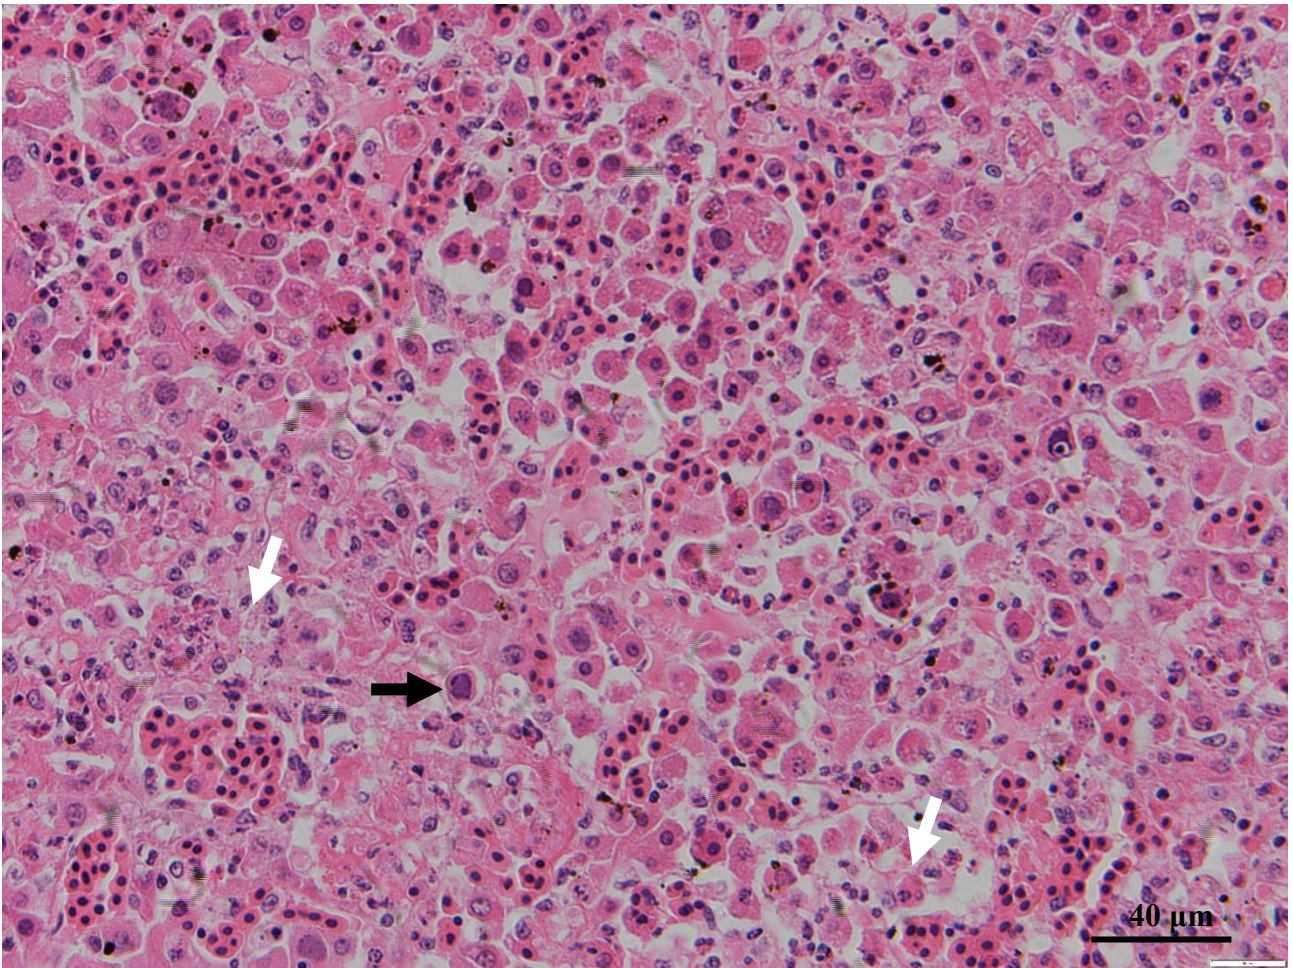

1

2 **Supplementary Figure 4:** Liver lesions of a chicken challenged with CH/CQBS/1504 (FAdV-8a) at  
3 5 d.p.c. Severe congestion, degeneration, necrosis (indicated with white arrows), and INIBs  
4 (indicated with a black arrow).
