# Supplementary material for: Isolation and molecular characterization of prevalent Fowl adenovirus strains in southwestern China during 2015–2016 for the development of a control strategy
Source: PubMed Central journal article supplement (PMC5717092; doi:10.1038/emi.2017.91), 2017-11-29
Supplement: emi201791x5.pdf [file emi201791x5.pdf]

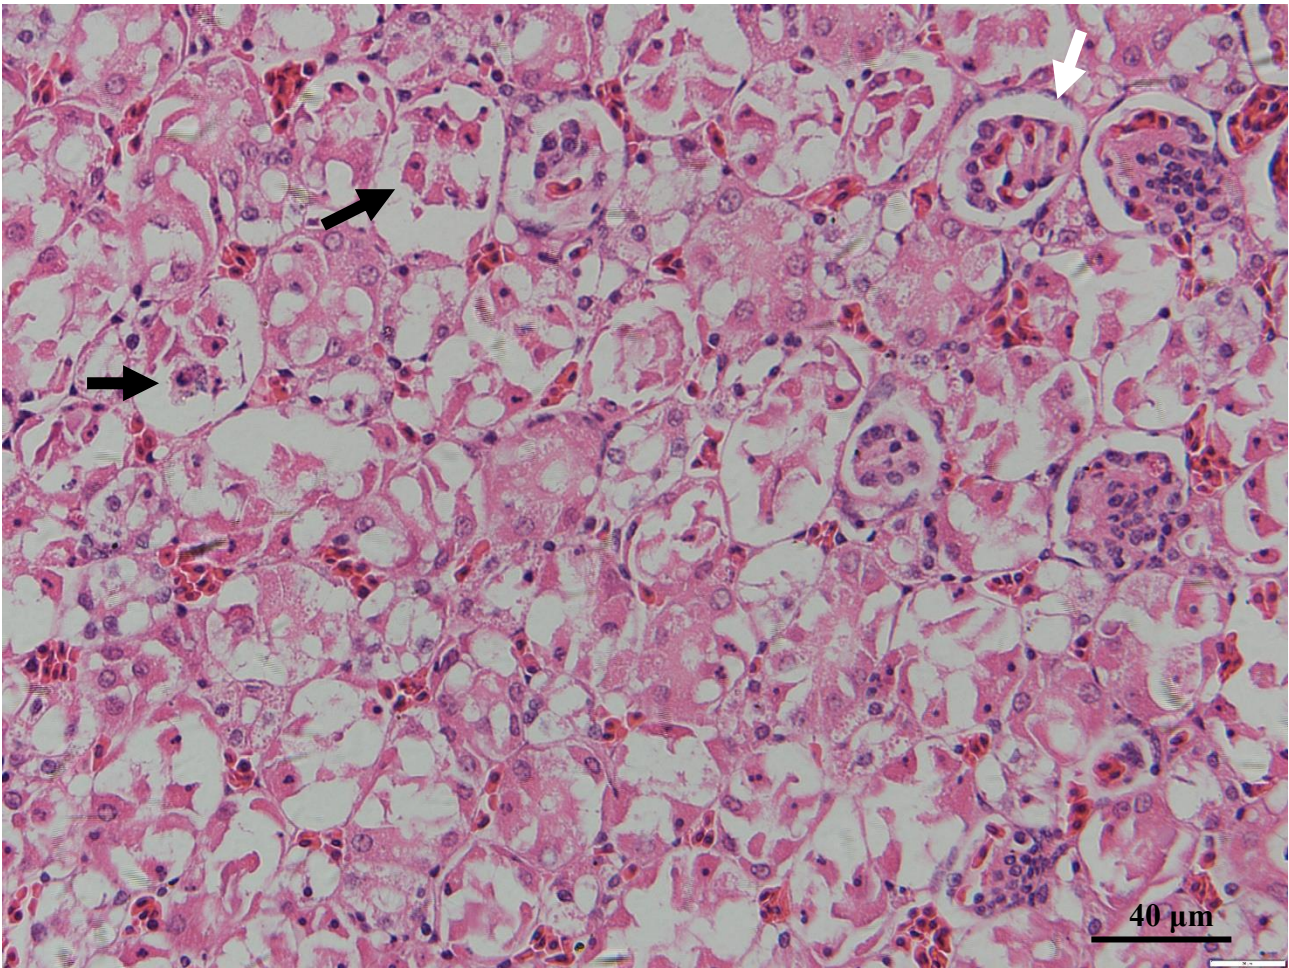

1

- 2 **Supplementary Figure 5:** Kidney lesions of a chicken challenged with CH/CQBS/1504 (FAdV-8a)  
3 at 5 d.p.c. Diffuse renal tubular epithelial cell coagulation necrosis and falling (indicated with black  
4 arrows) and glomerular capsule dilation (indicated with a white arrow).
