# Supplementary material for: Isolation and molecular characterization of prevalent Fowl adenovirus strains in southwestern China during 2015–2016 for the development of a control strategy
Source: PubMed Central journal article supplement (PMC5717092; doi:10.1038/emi.2017.91), 2017-11-29
Supplement: emi201791x6.pdf [file emi201791x6.pdf]

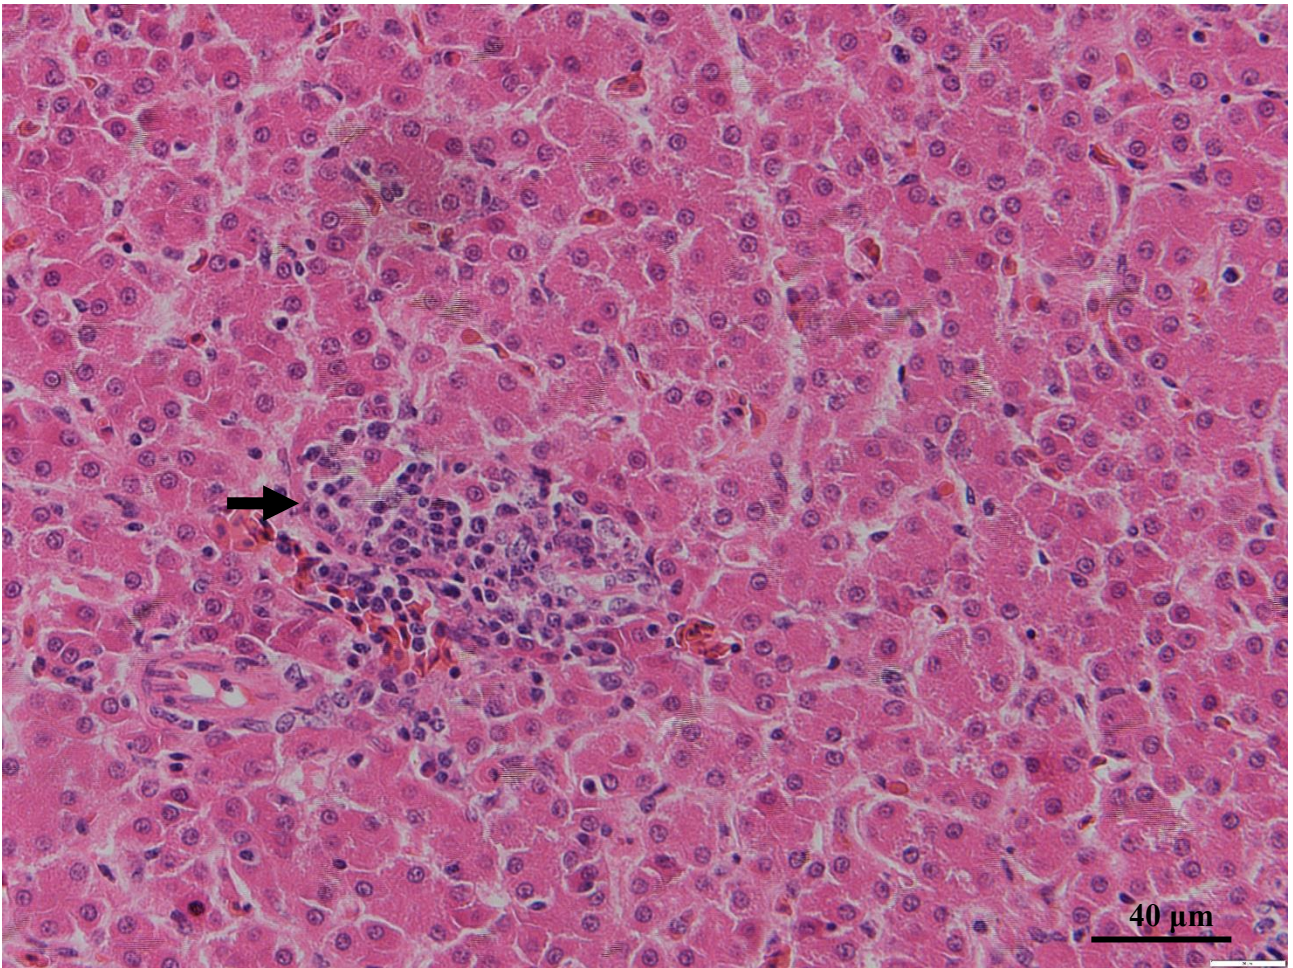

1

2 **Supplementary Figure S6:** Liver lesions of vaccinated chickens (b group) challenged with  
3 CH/GZXF/1602 (FAdV-4) at 5 d.p.c. A small amount of inflammatory cell infiltration (indicated  
4 with the black arrow) in liver tissue.
