# Supplementary material for: Isolation and molecular characterization of prevalent Fowl adenovirus strains in southwestern China during 2015–2016 for the development of a control strategy
Source: PubMed Central journal article supplement (PMC5717092; doi:10.1038/emi.2017.91), 2017-11-29
Supplement: emi201791x7.pdf [file emi201791x7.pdf]

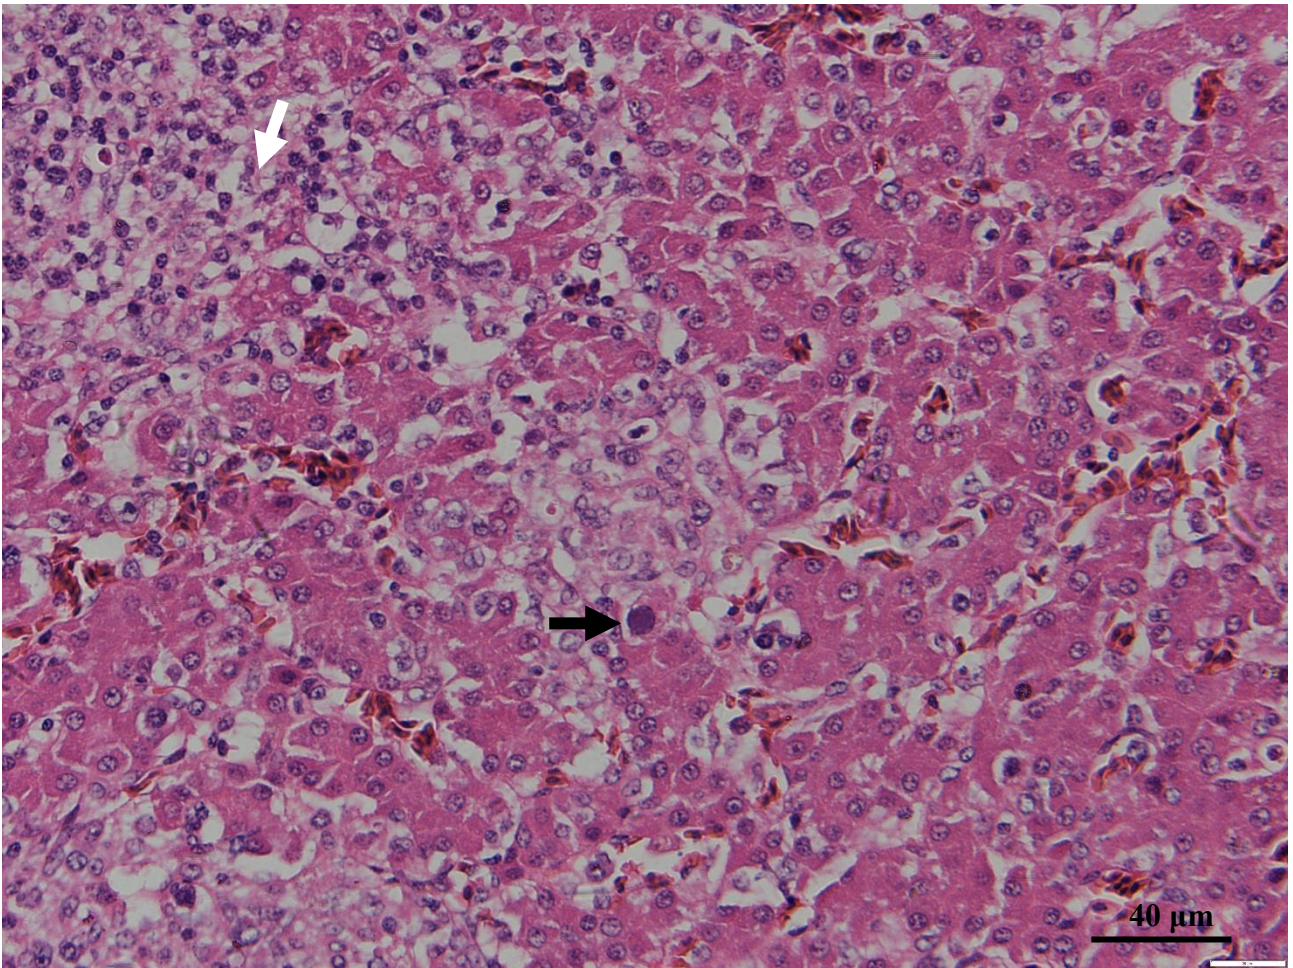

1

2 **Supplementary Figure S7:** Liver histological lesions of vaccinated chickens (f group) challenged  
3 with CH/CQBS/1504 (FAdV-8a) at 5 d.p.c. Inflammatory cells infiltration (indicated with the white  
4 arrow) and INIBs (indicated with the black arrow).
